# Supplementary material for: Using Patient-Derived Xenograft (PDX) Models as a ‘Black Box’ to Identify More Applicable Patients for ADP-Ribose Polymerase Inhibitor (PARPi) Treatment in Ovarian Cancer: Searching for Novel Molecular and Clinical Biomarkers and Performing a Prospective Preclinical Trial
Source: MDPI journal article supplement (doi:10.3390/cancers14194649), 2022-09-24
Supplement: s1 [file s1]

**Table S1. Response Category**

| Response<br>Category | Best Response (%) |
|----------------------|-------------------|
| CR                   | <-95%             |
| PR                   | [-95%, -50%)      |
| PR>SD                | [-50%, 0%)        |
| SD                   | [0%, 35%)         |
| SD>PD                | [35%, 100%)       |
| PD                   | Others            |

CR,complete remission; PR, partial remission; SD, stable disease; PD, progression disease.

**Table S2. Drug efficacy of PDX**

| No. | Niraparib | Olaparib | TC  |
|-----|-----------|----------|-----|
| 1   | No        | -        | Yes |
| 2   | No        | No       | No  |
| 3   | No        | -        | Yes |
| 4   | Yes       | -        | No  |

|    |     |     |     |
|----|-----|-----|-----|
| 5  | No  | Yes | Yes |
| 6  | No  | -   | Yes |
| 7  | Yes | Yes | -   |
| 8  | Yes | -   | Yes |
| 9  | No  | -   | Yes |
| 10 | Yes | -   | Yes |
| 11 | No  | No  | Yes |
| 12 | Yes | Yes | -   |
| 13 | No  | -   | No  |
| 14 | Yes | -   | -   |
| 15 | Yes | -   | Yes |
| 16 | Yes | -   | Yes |
| 17 | Yes | No  | Yes |
| 18 | No  | No  | Yes |
| 19 | No  | No  | -   |
| 20 | Yes | Yes | Yes |
| 21 | Yes | Yes | Yes |
| 22 | Yes | Yes | Yes |
| 23 | No  | No  | Yes |
| 24 | Yes | Yes | -   |
| 25 | Yes | Yes | -   |
| 26 | Yes | Yes | -   |

|    |     |     |     |
|----|-----|-----|-----|
| 27 | Yes | Yes | -   |
| 28 | Yes | Yes | Yes |
| 29 | Yes | Yes | Yes |
| 30 | Yes | Yes | -   |
| 31 | No  | Yes | -   |
| 32 | Yes | Yes | No  |
| 33 | Yes | No  | -   |
| 34 | -   | Yes | -   |
| 35 | Yes | Yes | -   |
| 36 | No  | Yes | -   |
| 37 | Yes | Yes | Yes |
| 38 | No  | -   | -   |
| 39 | No  | -   | -   |
| 40 | No  | No  | -   |

No, invalid (mSD>RD+mPD); Yes, valid (mSD+mPR>SD+mPR+mCR); TC, Paclitaxel and carboplatin.

**Table S3. Survival data of patients using PARPi as first- of second-line maintenance therapy.**

| First-line maintenance |           |         |     |              | Second-line maintenance |         |     |                |  |
|------------------------|-----------|---------|-----|--------------|-------------------------|---------|-----|----------------|--|
| N                      | therapy   |         |     | PDX's        | therapy                 |         |     | PDX's response |  |
| O                      | PARPi     | Recu    | PFS | response     | PARPi                   | Recur   | PFS |                |  |
|                        | r-rent    | (Month) |     |              | -rent                   | (Month) |     |                |  |
| 2                      | niraparib | Yes     | 10  | Non-Response | niraparib               | Yes     | 6   | Non-Response   |  |

|    |           |     |    |              |           |     |    |              |
|----|-----------|-----|----|--------------|-----------|-----|----|--------------|
| 5  | olaparib  | No  | 42 | Response     | -         | -   | -  | -            |
| 7  | olaparib  | Yes | 38 | Response     | -         | -   | -  | -            |
| 8  | olaparib  | No  | 16 | Response     | -         | -   | -  | -            |
| 15 | niraparib | Yes | 21 | Response     | olaparib  | No  | 24 | Response     |
| 16 | olaparib  | Yes | 21 | Response     | olaparib  | Yes | 18 | Response     |
| 17 | niraparib | No  | 37 | Response     | -         | -   | -  | -            |
| 18 | niraparib | Yes | 13 | Non-Response | olaparib  | Yes | 16 | Non-Response |
| 20 | niraparib | Yes | 28 | Response     | olaparib  | No  | 10 | Response     |
| 21 | niraparib | No  | 27 | Response     | -         | -   | -  | -            |
| 22 | olaparib  | Yes | 23 | Response     | niraparib | Yes | 12 | Response     |
| 24 | olaparib  | No  | 27 | Response     | -         | -   | -  | -            |
| 29 | -         | -   | -  | -            | olaparib  | Yes | 17 |              |
| 30 | niraparib | Yes | 16 | Response     | -         | -   | -  | -            |
| 31 | -         | -   | -  | -            | niraparib | No  | 8  | Non-Response |
| 37 | -         | -   | -  | -            | olaparib  | No  | 7  | Response     |

**Table S4. The comparison of gene amplification between response and non-response groups.**

| Gene   | P-value  | Odds_ratio | Percentage_Response | Percentage_No_Response | FDR |
|--------|----------|------------|---------------------|------------------------|-----|
|        |          | o          | se                  | nse                    |     |
| PAX8   | 0.116615 | inf        | 0.333333            | 0                      | 1   |
| NKX2-1 | 0.116615 | inf        | 0.333333            | 0                      | 1   |
| SOX2   | 0.167468 | 5          | 0.75                | 0.375                  | 1   |

|        |          |          |          |       |   |
|--------|----------|----------|----------|-------|---|
| CDKN2A | 0.324561 | 5        | 0.416667 | 0.125 | 1 |
| BRCA1  | 0.347265 | 0.333333 | 0.166667 | 0.375 | 1 |
| MYC    | 0.347265 | 3        | 0.833333 | 0.625 | 1 |
| MDM2   | 0.356347 | 0.333333 | 0.25     | 0.5   | 1 |
| CCND1  | 0.356347 | 0.333333 | 0.25     | 0.5   | 1 |
| CDKN1B | 0.372851 | 0.333333 | 0.5      | 0.75  | 1 |
| NF1    | 0.4      | 0        | 0        | 0.125 | 1 |
| STK11  | 0.494737 | inf      | 0.166667 | 0     | 1 |
| ERBB2  | 0.536842 | 0.272727 | 0.083333 | 0.25  | 1 |
| ATM    | 0.642415 | 0.555556 | 0.25     | 0.375 | 1 |
| CDK4   | 0.647916 | 0.5      | 0.333333 | 0.5   | 1 |
| BCL2L1 | 0.647916 | 2        | 0.666667 | 0.5   | 1 |
| KRAS   | 0.647916 | 2        | 0.666667 | 0.5   | 1 |
| E2F3   | 0.669921 | 0.6      | 0.5      | 0.625 | 1 |
| IKZF2  | 0.669921 | 1.666667 | 0.5      | 0.375 | 1 |
| MLL3   | 1        | 1        | 0.5      | 0.5   | 1 |

**Table S5. The comparison of gene deletion between response and non-response groups.**

| Gene | <i>P-value</i> | Odds_ratio | Percentage_ | Percentage_No_ | <i>FDR</i> |
|------|----------------|------------|-------------|----------------|------------|
|      |                |            | Response    | Response       |            |
| AKT1 | 0.014654       | inf        | 0.583333    | 0              | 0.5129     |
| KRAS | 0.049123       | 0          | 0           | 0.375          | 0.566802   |
| NF1  | 0.062332       | 8.333333   | 0.833333    | 0.375          | 0.566802   |

|        |          |          |          |       |          |
|--------|----------|----------|----------|-------|----------|
| SMAD4  | 0.064777 | 9        | 0.75     | 0.25  | 0.566802 |
| PDGFRA | 0.161094 | 0.2      | 0.166667 | 0.5   | 0.837342 |
| ERBB2  | 0.161094 | 5        | 0.833333 | 0.5   | 0.837342 |
| CDKN2A | 0.167468 | 0.2      | 0.25     | 0.625 | 0.837342 |
| MDM4   | 0.347265 | 0.333333 | 0.166667 | 0.375 | 1        |
| CCND1  | 0.494737 | inf      | 0.166667 | 0     | 1        |
| IGF1R  | 0.536842 | 0.272727 | 0.083333 | 0.25  | 1        |
| MYCN   | 0.536842 | 0.272727 | 0.083333 | 0.25  | 1        |
| CCNE1  | 0.536842 | 0.272727 | 0.083333 | 0.25  | 1        |
| E2F3   | 0.536842 | 0.272727 | 0.083333 | 0.25  | 1        |
| NEDD9  | 0.536842 | 0.272727 | 0.083333 | 0.25  | 1        |
| CDK4   | 0.602683 | 3.5      | 0.333333 | 0.125 | 1        |
| STK11  | 0.618576 | 0.428571 | 0.75     | 0.875 | 1        |
| MLL3   | 0.618576 | 2.333333 | 0.25     | 0.125 | 1        |
| CDK6   | 0.618576 | 2.333333 | 0.25     | 0.125 | 1        |
| FAT1   | 0.618576 | 0.428571 | 0.75     | 0.875 | 1        |

**Table S6. The comparison of gene mutation between response and non-response groups.**

| Gene   | Odds_ratio | P-value  | Percentage_Response | Percentage_No_Response | FDR |
|--------|------------|----------|---------------------|------------------------|-----|
| SYMPK  | 0.04       | 0.147368 | 0.0001              | 0.25                   | 1   |
| SELP   | 0.04       | 0.147368 | 0.0001              | 0.25                   | 1   |
| COL6A5 | 0.04       | 0.147368 | 0.0001              | 0.25                   | 1   |

|          |      |          |        |        |          |
|----------|------|----------|--------|--------|----------|
| ABCB5    | 0.04 | 0.147368 | 0.0001 | 0.25   | <i>I</i> |
| MTCL1    | 0.04 | 0.147368 | 0.0001 | 0.25   | <i>I</i> |
| NF2      | 0.04 | 0.147368 | 0.0001 | 0.25   | <i>I</i> |
| MUTYH    | 0.04 | 0.147368 | 0.0001 | 0.25   | <i>I</i> |
| LRRK2    | 25   | 0.242105 | 0.25   | 0.0001 | <i>I</i> |
| SI       | 25   | 0.242105 | 0.25   | 0.0001 | <i>I</i> |
| EYS      | 25   | 0.242105 | 0.25   | 0.0001 | <i>I</i> |
| KDM6A    | 0.04 | 0.4      | 0.0001 | 0.125  | <i>I</i> |
| GRIN3A   | 0.04 | 0.4      | 0.0001 | 0.125  | <i>I</i> |
| MS4A12   | 0.04 | 0.4      | 0.0001 | 0.125  | <i>I</i> |
| GSG2     | 0.04 | 0.4      | 0.0001 | 0.125  | <i>I</i> |
| HIST1H4D | 0.04 | 0.4      | 0.0001 | 0.125  | <i>I</i> |
| MYCBP2   | 0.04 | 0.4      | 0.0001 | 0.125  | <i>I</i> |
| CYP2A13  | 0.04 | 0.4      | 0.0001 | 0.125  | <i>I</i> |
| GLTPD2   | 0.04 | 0.4      | 0.0001 | 0.125  | <i>I</i> |
| TRPM1    | 0.04 | 0.4      | 0.0001 | 0.125  | <i>I</i> |

---
