# Supplementary material for: Using Patient-Derived Xenograft (PDX) Models as a ‘Black Box’ to Identify More Applicable Patients for ADP-Ribose Polymerase Inhibitor (PARPi) Treatment in Ovarian Cancer: Searching for Novel Molecular and Clinical Biomarkers and Performing a Prospective Preclinical Trial
Source: Cancers (Basel). 2022 Sep 24;14(19):4649. doi: 10.3390/cancers14194649 (PMC9563731; doi:10.3390/cancers14194649)
Supplement: Supplementary file 1 [file cancers-14-04649-s001.zip]

Archive with 7 entries (7 files):
- Supplementary Figure Legend.pdf
- Supplementary Figure S1.pdf
- Supplementary Figure S2.pdf
- Supplementary Figure S3.pdf
- Supplementary Figure S4.pdf
- Supplementary Figure S5.pdf
- Supplementary Table.pdf
