# Supplementary material for: Using Patient-Derived Xenograft (PDX) Models as a ‘Black Box’ to Identify More Applicable Patients for ADP-Ribose Polymerase Inhibitor (PARPi) Treatment in Ovarian Cancer: Searching for Novel Molecular and Clinical Biomarkers and Performing a Prospective Preclinical Trial
Source: Cancers (Basel). 2022 Sep 24;14(19):4649. doi: 10.3390/cancers14194649 (PMC9563731; doi:10.3390/cancers14194649)
Supplement: Supplementary file 1 [file cancers-14-04649-s001.zip › Supplementary Figure S4.pdf]

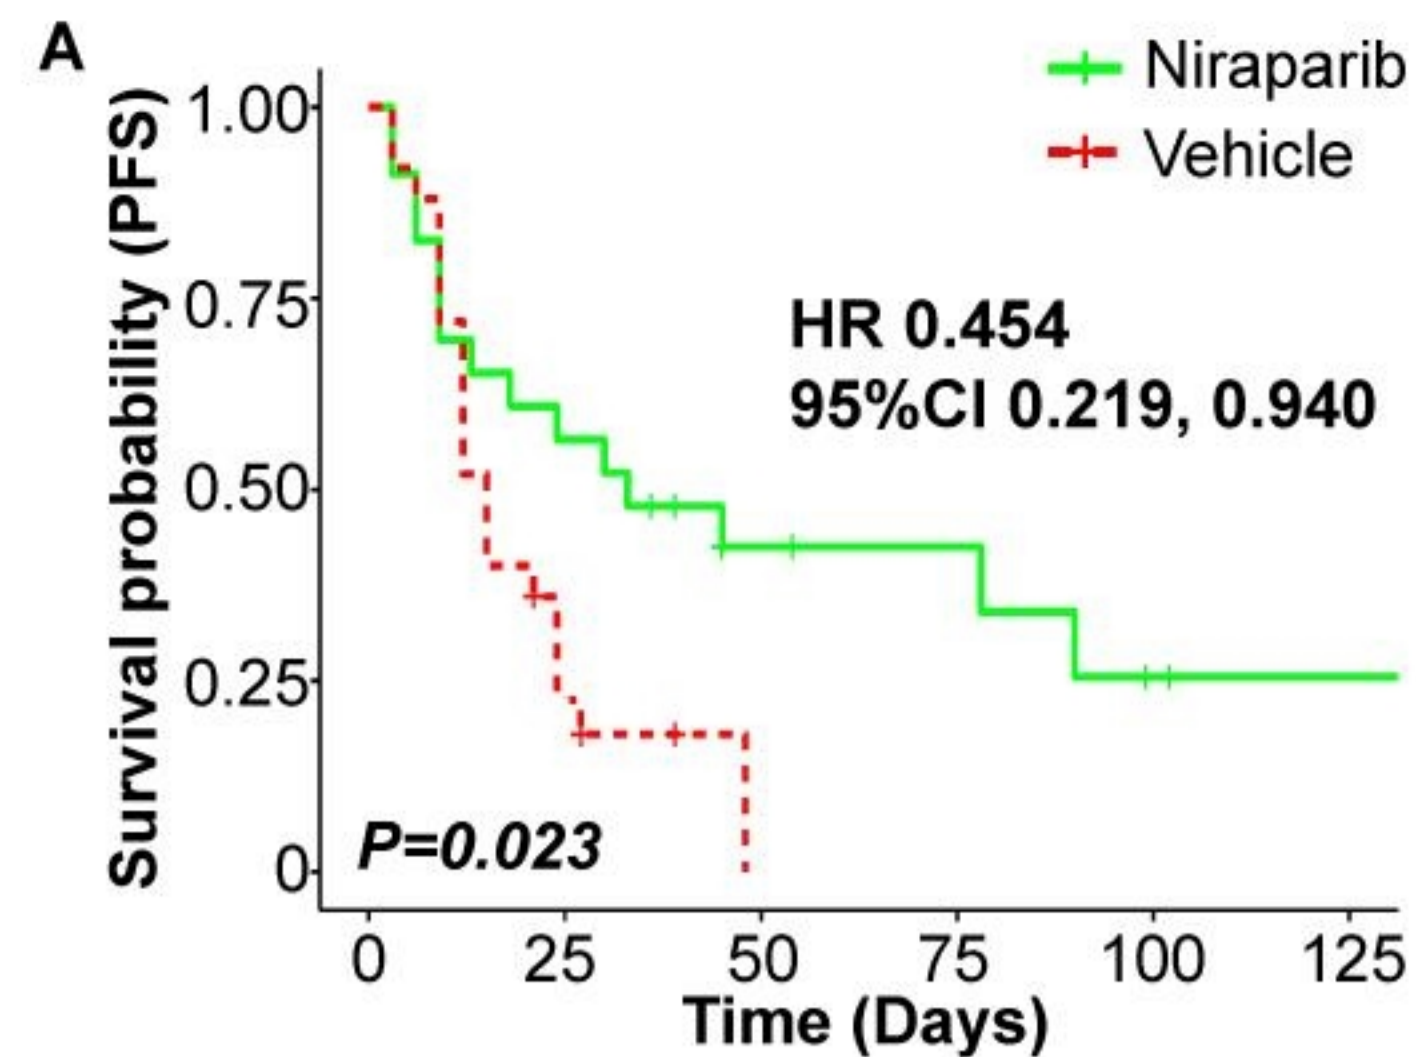

Number at risk

|           |    |    |   |   |   |   |
|-----------|----|----|---|---|---|---|
| Niraparib | 23 | 13 | 7 | 5 | 2 | 1 |
| Vehicle   | 25 | 5  | 0 | 0 | 0 | 0 |

Time (Days)

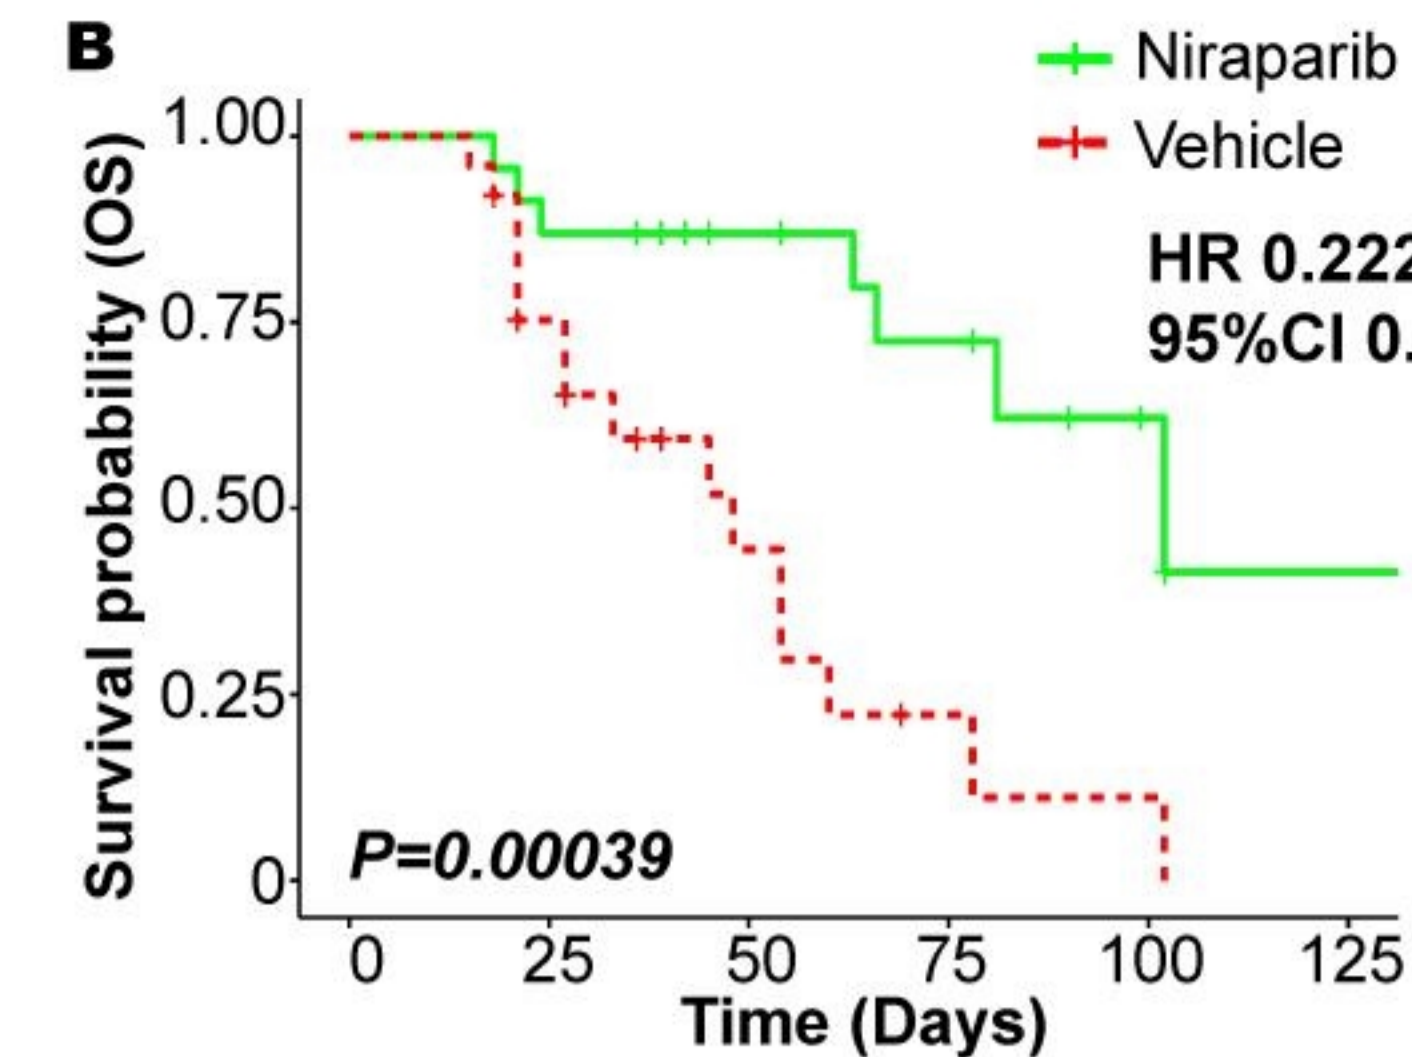

Number at risk

|           |    |    |    |    |   |   |
|-----------|----|----|----|----|---|---|
| Niraparib | 23 | 20 | 15 | 10 | 3 | 1 |
| Vehicle   | 25 | 15 | 6  | 2  | 1 | 0 |

Time (Days)

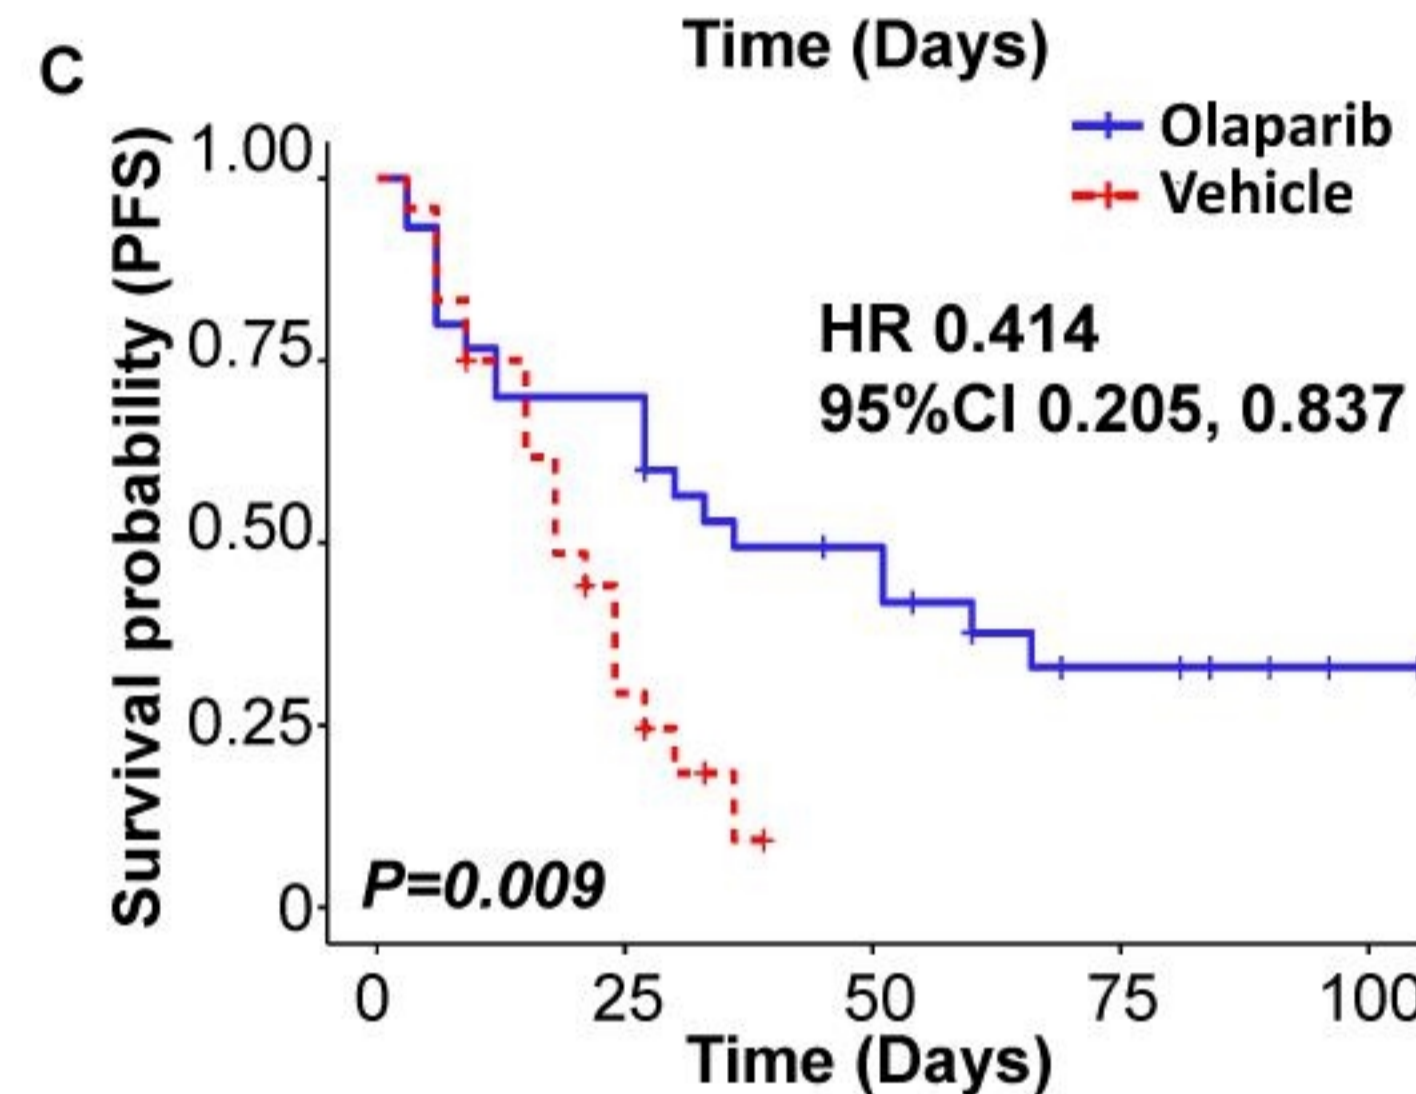

Number at risk

|          |    |    |    |   |   |
|----------|----|----|----|---|---|
| Olaparib | 30 | 21 | 13 | 6 | 1 |
| Vehicle  | 24 | 6  | 0  | 0 | 0 |

Time (Days)

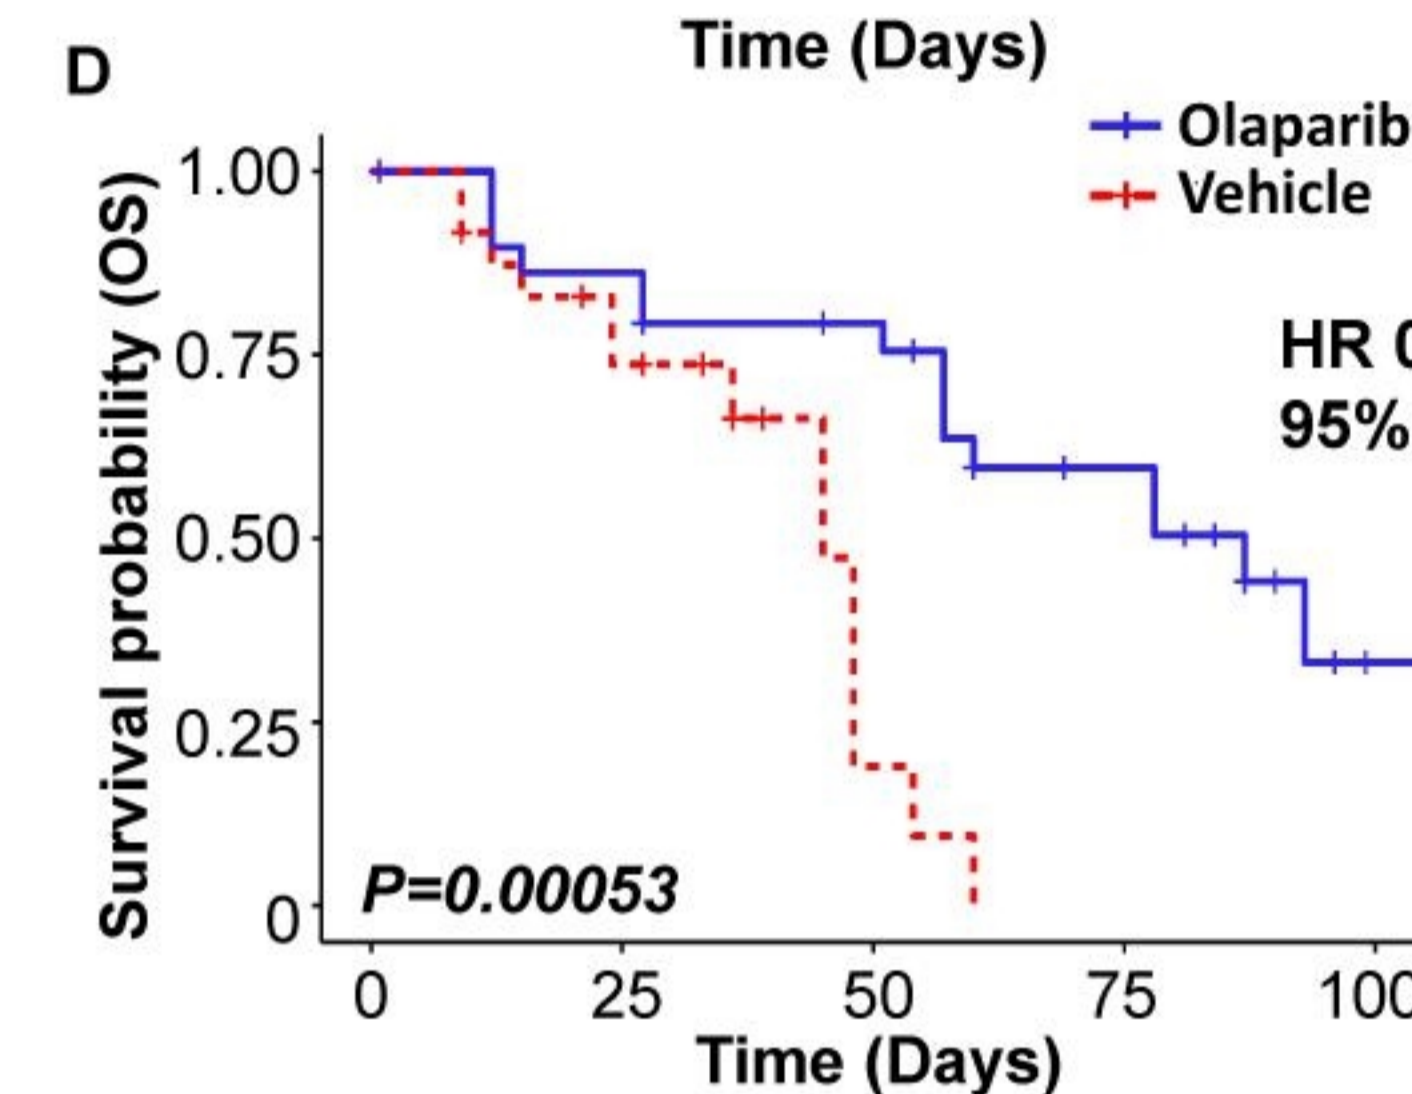

Number at risk

|          |    |    |    |    |   |
|----------|----|----|----|----|---|
| Olaparib | 30 | 25 | 21 | 13 | 1 |
| Vehicle  | 24 | 16 | 2  | 0  | 0 |

Time (Days)

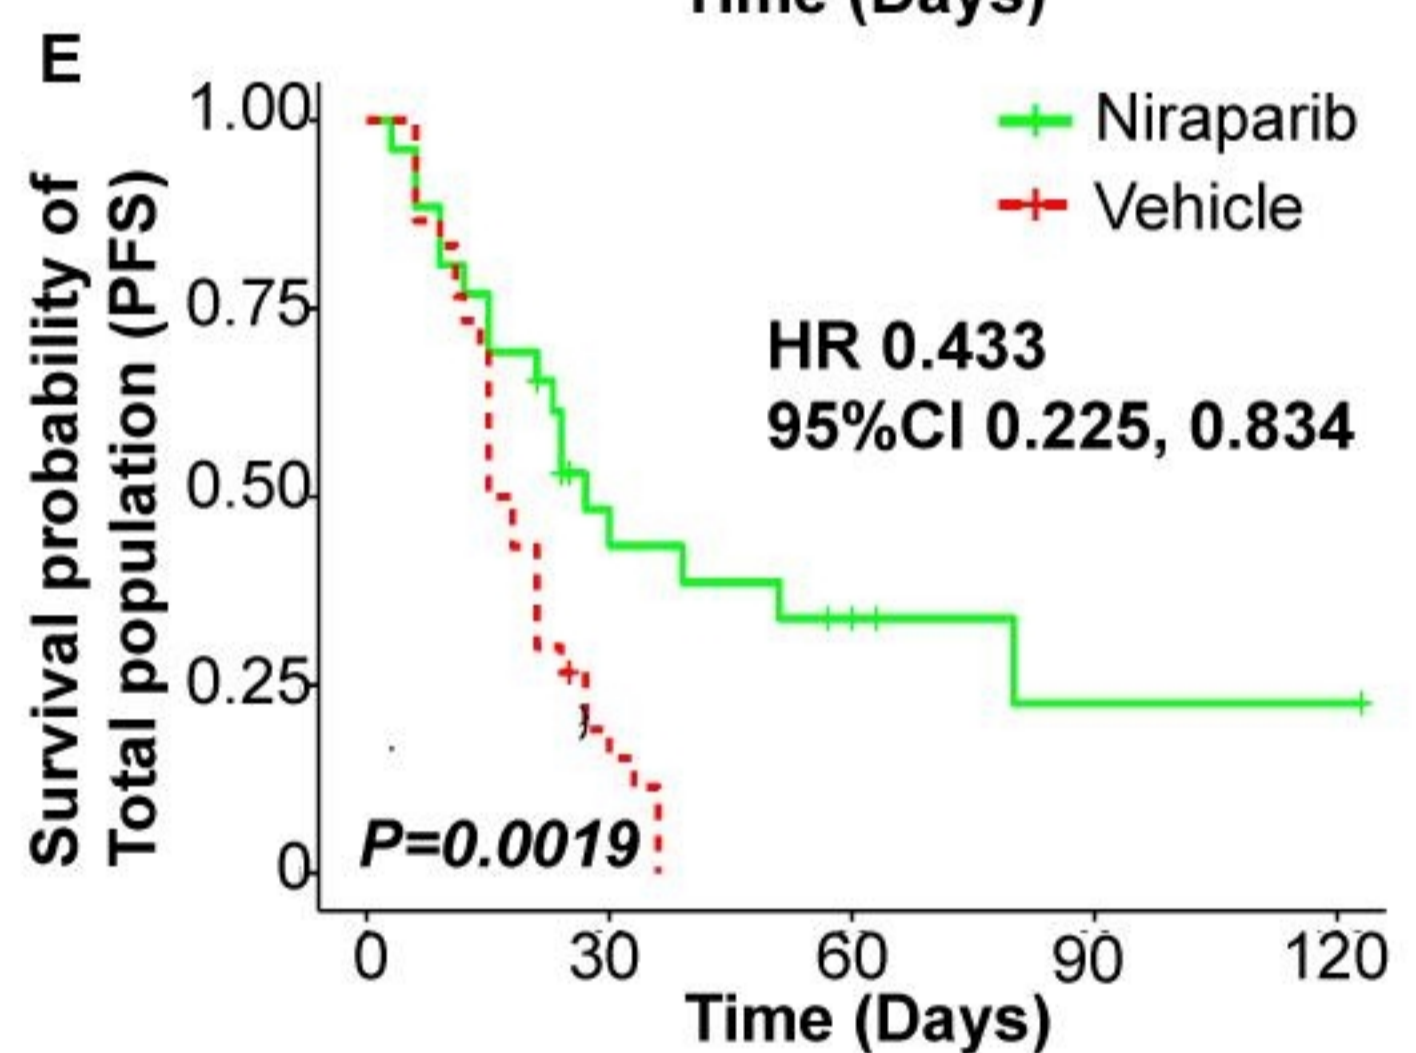

Number at risk

|           |    |    |   |   |   |
|-----------|----|----|---|---|---|
| Niraparib | 26 | 10 | 6 | 2 | 2 |
| Vehicle   | 30 | 5  | 0 | 0 | 0 |

Time (Days)

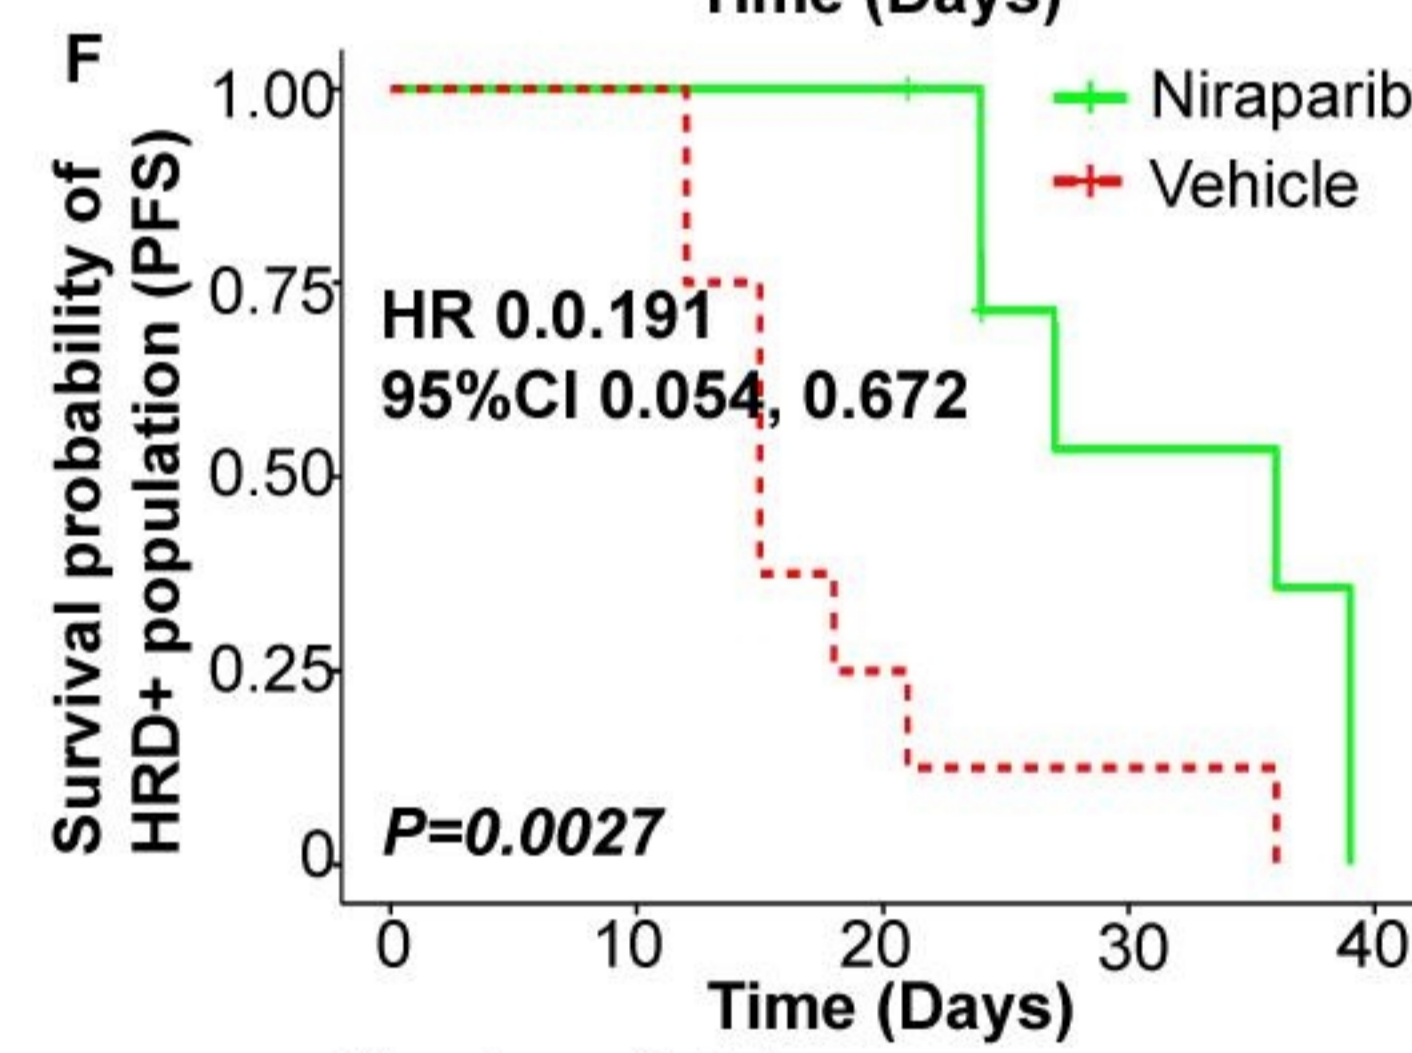

Number at risk

|           |   |   |   |   |
|-----------|---|---|---|---|
| Niraparib | 8 | 6 | 3 | 0 |
| Vehicle   | 8 | 2 | 1 | 0 |

Time (Days)

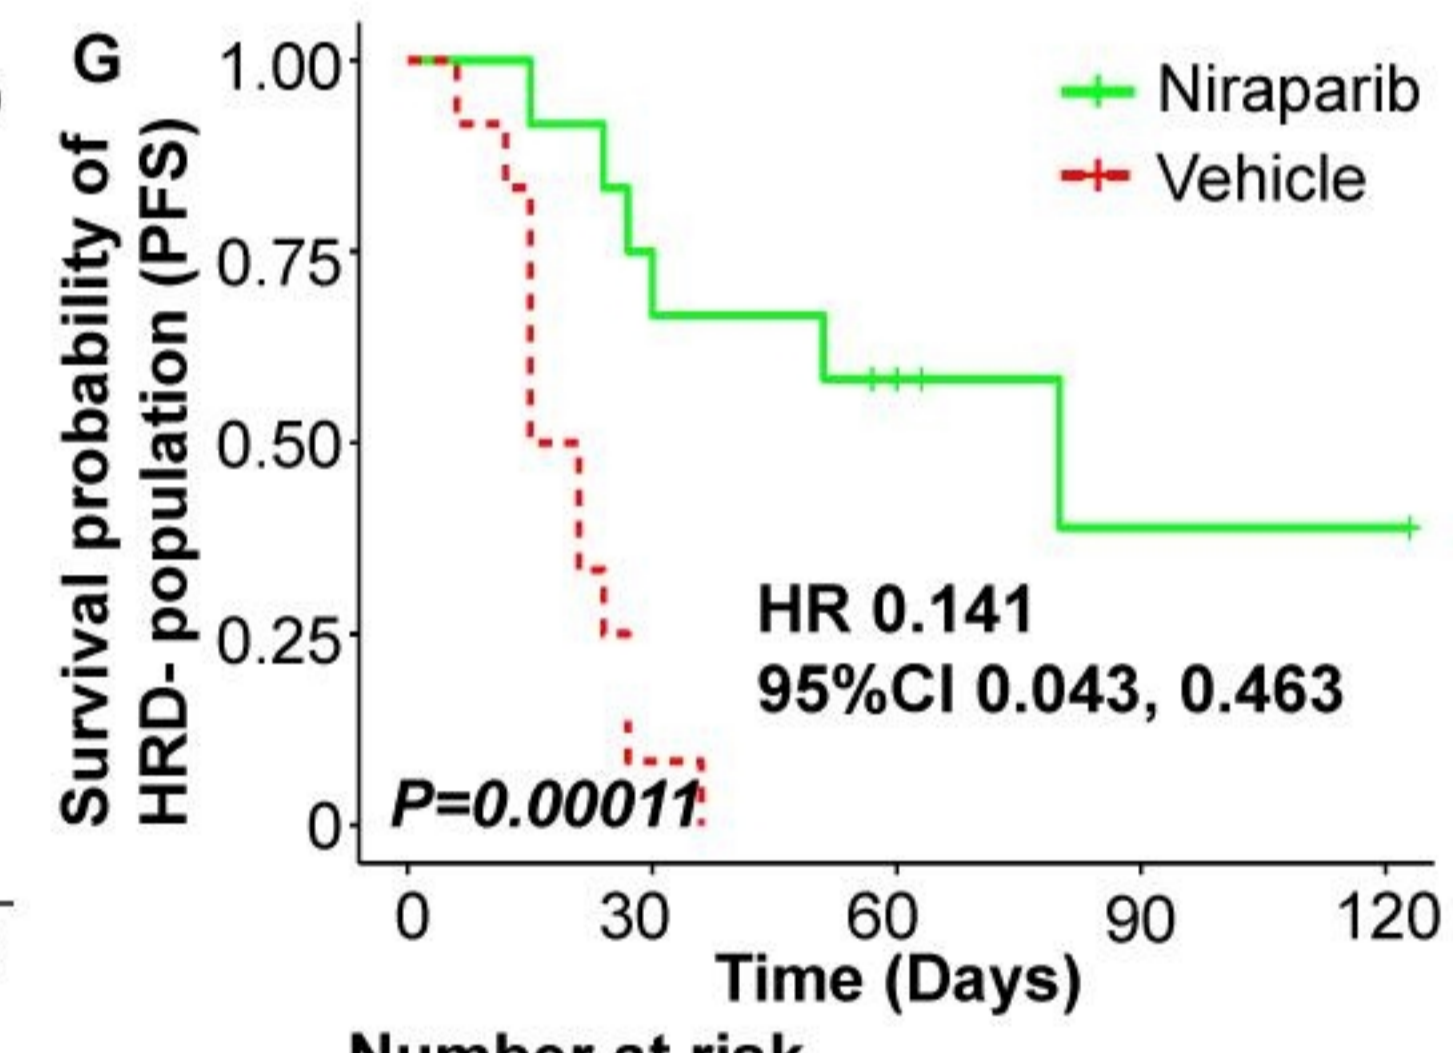

Number at risk

|           |    |   |   |   |   |
|-----------|----|---|---|---|---|
| Niraparib | 12 | 9 | 6 | 2 | 2 |
| Vehicle   | 12 | 1 | 0 | 0 | 0 |

Time (Days)

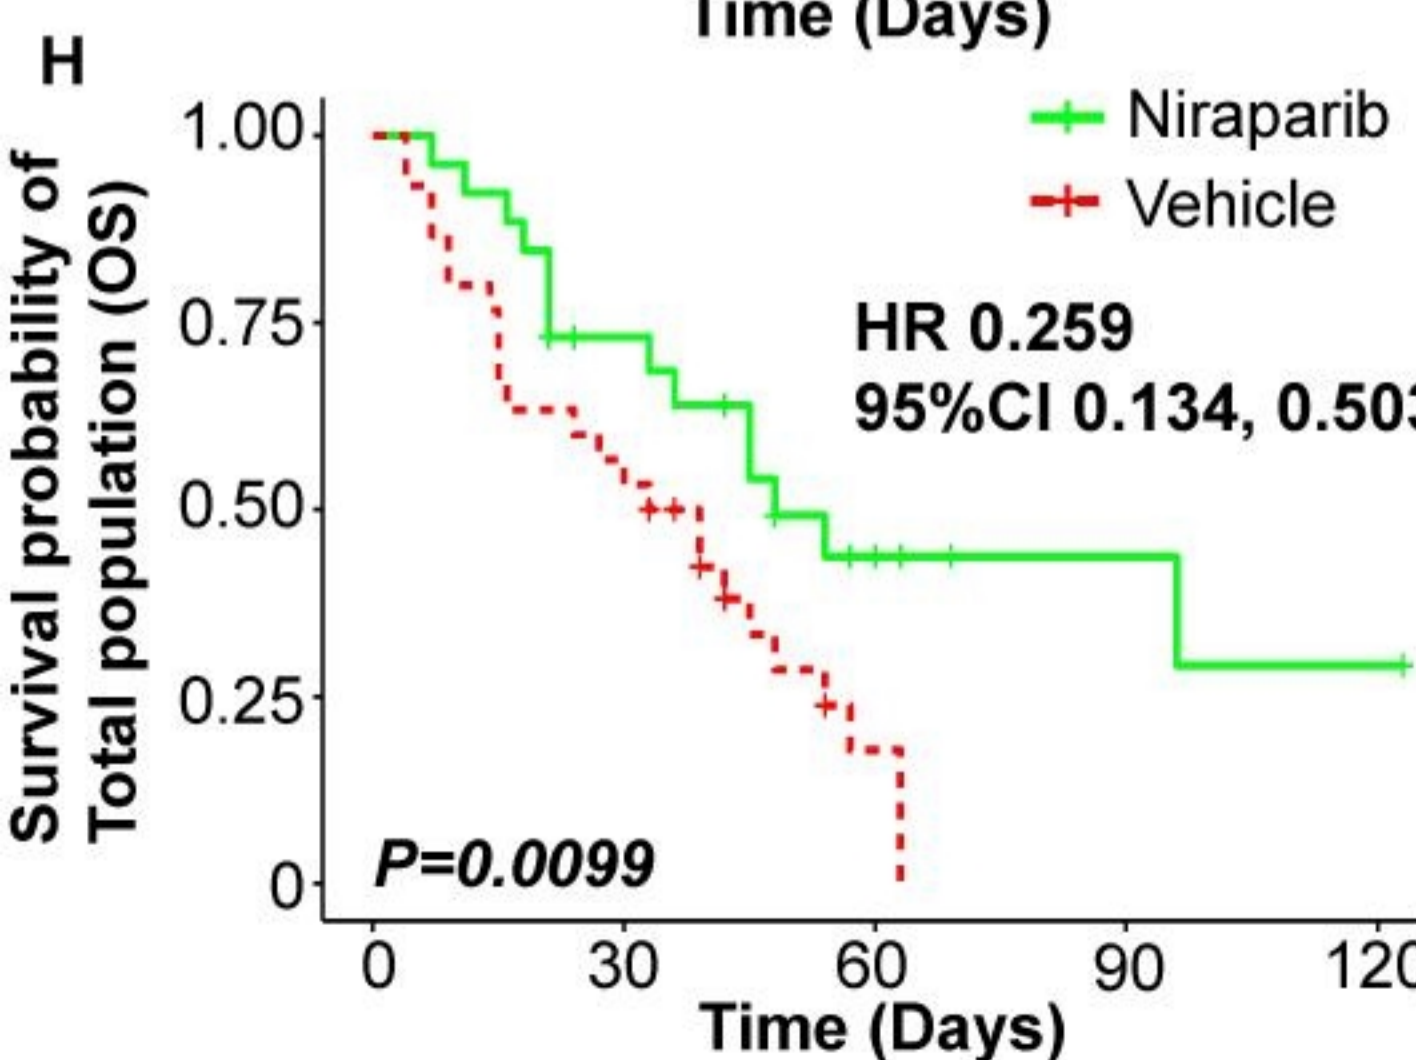

Number at risk

|           |    |    |   |   |   |
|-----------|----|----|---|---|---|
| Niraparib | 26 | 16 | 7 | 3 | 2 |
| Vehicle   | 30 | 17 | 3 | 0 | 0 |

Time (Days)

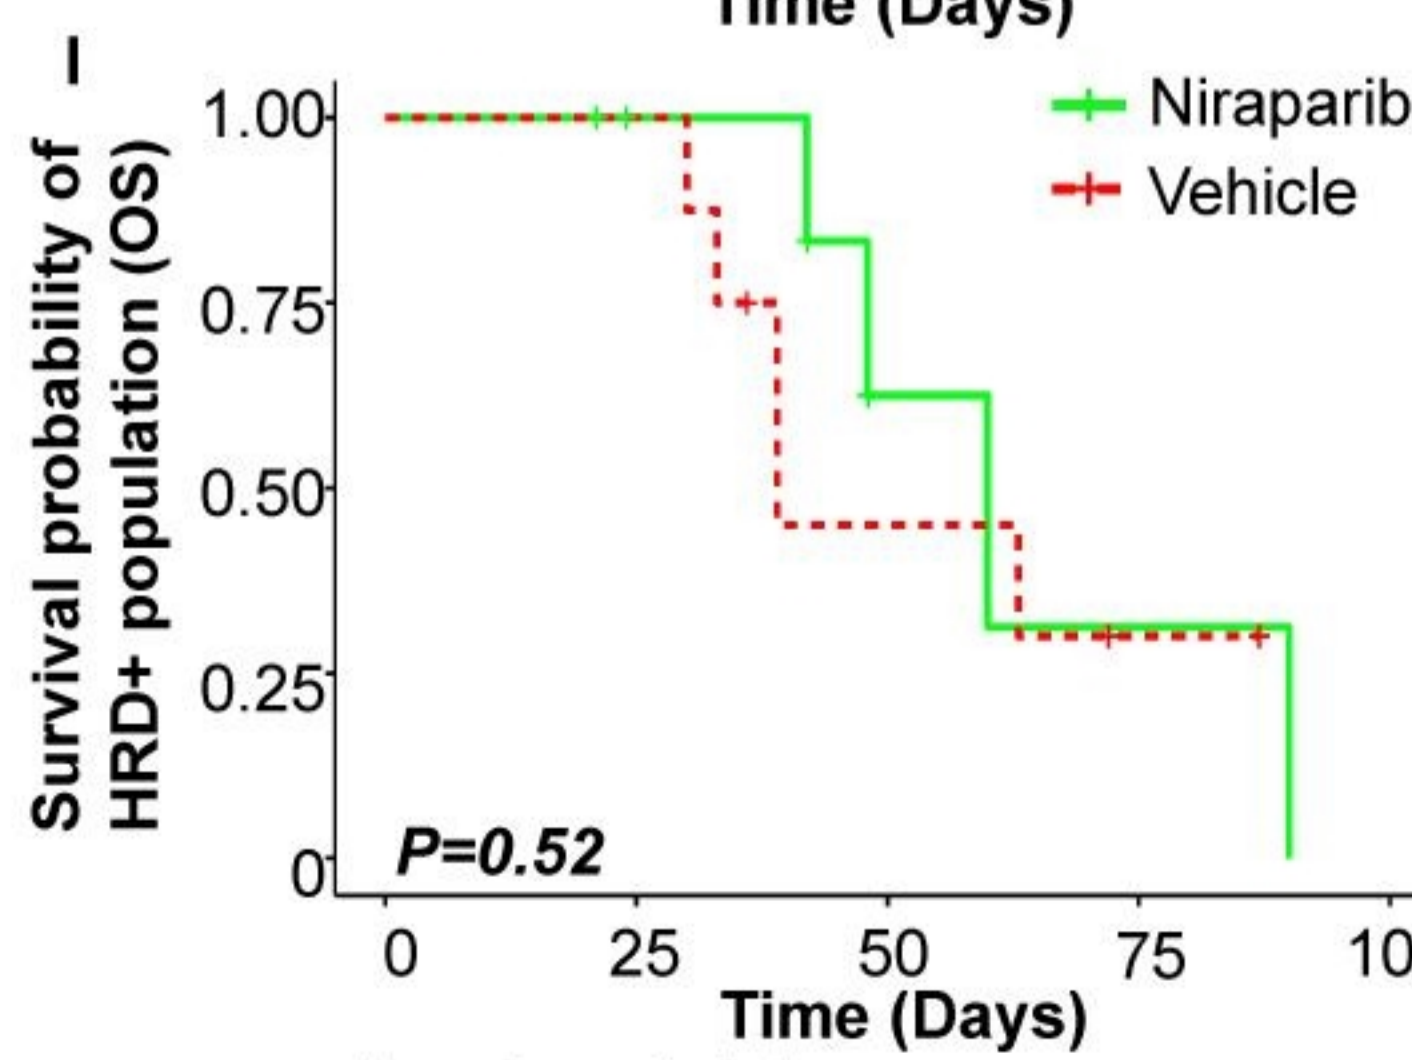

Number at risk

|           |   |   |   |   |
|-----------|---|---|---|---|
| Niraparib | 8 | 6 | 3 | 2 |
| Vehicle   | 6 | 3 | 0 | 0 |

Time (Days)

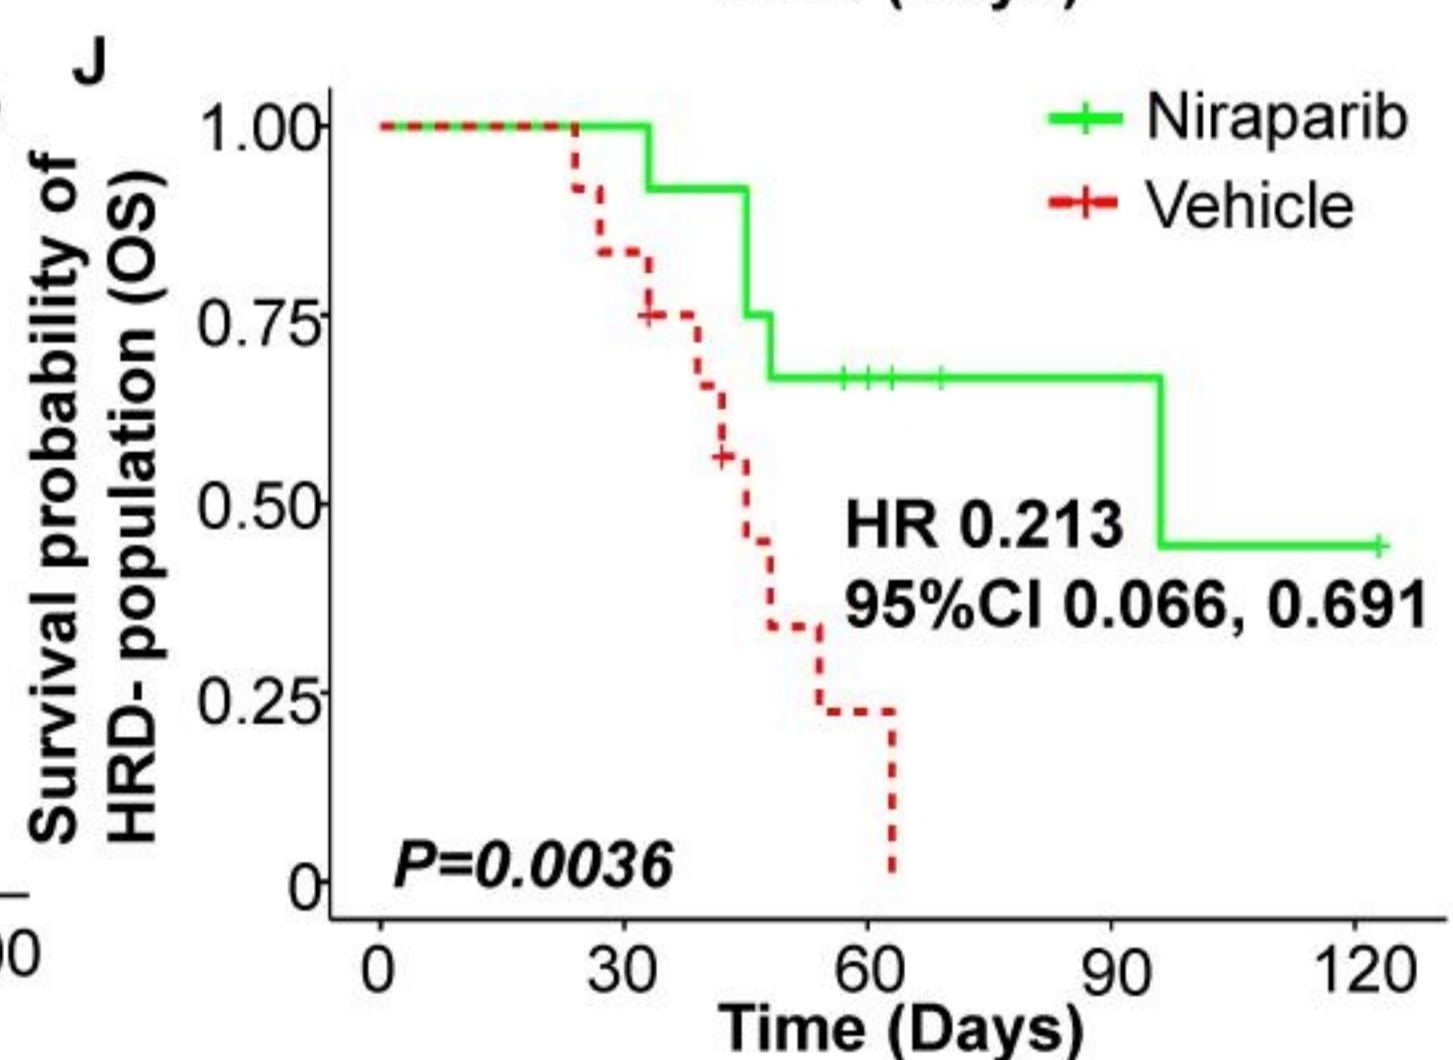

Number at risk

|           |    |   |   |   |   |
|-----------|----|---|---|---|---|
| Niraparib | 12 | 8 | 3 | 2 | 0 |
| Vehicle   | 11 | 3 | 0 | 0 | 0 |

Time (Days)
